# Supplementary material for: Prevalence, Seroprevalence and Risk Factors of Avian Influenza in Wild Bird Populations in Korea: A Systematic Review and Meta-Analysis
Source: MDPI journal article supplement (doi:10.3390/v15020472), 2023-02-08
Supplement: s1 [file s1]

**Table S2:** Characteristics of 39 studies included in the meta-analysis of prevalence of avian influenza virus in wild birds in South Korea.

| Author/Year       | Publication status | Sampling season | Sample size | Positive samples | Sample type  | Detection method | Bird species                      |
|-------------------|--------------------|-----------------|-------------|------------------|--------------|------------------|-----------------------------------|
| Baek et al. 2021  | Published          | NR              | 13033       | 75               | mixed        | RT-PCR           | NR                                |
| Cheon et al. 2018 | Published          | NR              | 52693       | 413              | feces        | HA-test          | NR                                |
| Kim et al. 2015   | Published          | NR              | 771         | 167              | carcass      | RT-PCR           | NR                                |
| Kim et al. 2016   | Published          | Fall/Winter     | 27          | 19               | carcass      | RT-PCR           | Anseriformes                      |
| Kim et al. 2019   | Published          | Fall/Winter     | 11145       | 124              | feces        | rRT-PCR          | NR                                |
| Kim et al. 2021   | Published          | NR              | 16317       | 445              | feces        | RT-PCR           | NR                                |
| Kwon et al. 2017  | Published          | Fall/Winter     | 50          | 1                | feces        | RT-PCR           | NR                                |
| Kwon et al. 2017  | Published          | Fall/Winter     | 391         | 1                | feces        | virus isolation  | NR                                |
| Kwon et al. 2018  | Published          | Fall/Winter     | 453         | 40               | feces        | RT-PCR           | NR                                |
| Kang et al. 2010  | Published          | NR              | 28214       | 225              | feces        | RT-PCR           | NR                                |
| Jeong et al. 2014 | Published          | NR              | 9984        | 10               | cloacal swab | RT-PCR           | Anseriformes, Charadriiformes, NR |
| Jung 2018         | Non-published      | Fall/Winter     | 2184        | 24               | feces        | RT-PCR           | Anseriformes, NR                  |
| Lee et al. 2010   | Published          | Fall/Winter     | 743         | 35               | feces        | virus isolation  | Anseriformes                      |
| Lee et al. 2010   | Published          | Fall/Winter     | 1721        | 16               | feces        | rRT-PCR          | NR                                |
| Lee et al. 2011   | Published          | Fall/Winter     | 728         | 16               | feces        | rRT-PCR          | NR                                |

|                    |               |             |       |      |                              |         |                                             |
|--------------------|---------------|-------------|-------|------|------------------------------|---------|---------------------------------------------|
| Lee et al. 2017    | Published     | NR          | 31146 | 202  | feces, cloacal swab          | RT-PCR  | NR                                          |
| Lee et al. 2018    | Published     | NR          | 74162 | 590  | NR                           | RT-PCR  | NR                                          |
| Lee et al. 2020    | Published     | NR          | 15001 | 180  | NR                           | RT-PCR  | NR                                          |
| Nam et al. 2011    | Published     | Fall/Winter | 350   | 16   | feces                        | RT-PCR  | NR                                          |
| Na et al. 2021     | Published     | Fall/Winter | 2499  | 2    | feces                        | rRT-PCR | NR                                          |
| Nguyen et al. 2021 | Published     | Fall/Winter | 500   | 30   | feces                        | RT-PCR  | NR                                          |
| Oh et al. 2018     | Published     | NR          | 38921 | 123  | feces                        | RT-PCR  | NR                                          |
| Shin et al. 2015   | Published     | Fall/Winter | 20508 | 1497 | feces, carcass, cloacal swab | RT-PCR  | Anseriformes, Pelecaniformes, NR            |
| Yeo at al. 2021    | Published     | NR          | 500   | 30   | feces                        | HA-test | NR                                          |
| Yeo at al. 2019    | Published     | Fall/Winter | 500   | 1    | feces                        | RT-PCR  | NR                                          |
| Na 2020            | Non-published | Fall/Winter | 3256  | 28   | feces                        | rRT-PCR | NR                                          |
| Nam 2019           | Non-published | NR          | 14720 | 201  | feces                        | RT-PCR  | NR                                          |
| Kang 2016          | Non-published | NR          | 13386 | 103  | Feces                        | RT-PCR  | NR                                          |
| Shin 2016          | Non-published | NR          | 44078 | 1624 | Feces, carcass, cloacal swab | RT-PCR  | Anseriformes, Charadriiformes, Gaviiformes, |

|           |               |             |       |     |                                    |         |                                                                                                              |
|-----------|---------------|-------------|-------|-----|------------------------------------|---------|--------------------------------------------------------------------------------------------------------------|
|           |               |             |       |     |                                    |         | Passeriformes,<br>Strigiformes, Gruiformes,<br>Columbiformes,<br>Ciconiiformes, NR                           |
| NIER 2012 | Non-published | NR          | 11128 | 522 | feces                              | RT-PCR  | NR                                                                                                           |
|           |               |             |       |     | Carcass,<br>cloacal swab           | HA-test | Anseriformes,<br>Gruiformes,<br>Passeriformes                                                                |
| NIER 2013 | Non-published | NR          | 11007 | 493 | feces                              | RT-PCR  | Columbiformes                                                                                                |
|           |               |             |       |     | cloacal swab,<br>carcass           | HA-test | Anseriformes,<br>Columbiformes,<br>Passeriformes, NR                                                         |
| NIER 2014 | Non-published | NR          | 10485 | 463 | feces                              | RT-PCR  | NR                                                                                                           |
| NIER 2016 | Non-published | NR          | 27643 | 111 | Feces,<br>carcass,<br>cloacal swab | RT-PCR  | NR                                                                                                           |
| EWU 2007  | Non-published | Fall/Winter | 740   | 8   | Feces,<br>carcass                  | RT-PCR  | Anseriformes,<br>Galliformes, Columbidae,<br>Passeriformes,<br>Piciformes,<br>Pelecaniformes,<br>Galliformes |
| NIER 2011 | Non-published | NR          | 17784 | 181 | feces, cloacal<br>swab, carcass    | RT-PCR  | Anseriformes,<br>Charadriiformes,<br>Passeriformes,<br>Columbidae,<br>Cuculiformes, NR                       |
| NIER 2015 | Non-published | NR          | 15566 | 796 | Feces,<br>cloacal swab             | RT-PCR  | NR                                                                                                           |

|           |               |    |       |     |                   |         |                                                                                                                                                                                                                       |
|-----------|---------------|----|-------|-----|-------------------|---------|-----------------------------------------------------------------------------------------------------------------------------------------------------------------------------------------------------------------------|
| APQA 2006 | Non-published | NR | 689   | 3   | cloacal swab      | HA-test | Anseriformes,<br>Charadriiformes,<br>Accipitriformes,<br>Strigiformes,<br>Pelecaniformes,<br>Piciformes,<br>Accipitriformes, NR                                                                                       |
| APQA 2019 | Non-published | NR | 20219 | 178 | cloacal swab      | HA-test | Anseriformes,<br>Charadriiformes,<br>Passeriformes,<br>Columbiformes,<br>Gruiformes,<br>Pelecaniformes,<br>Piciformes,<br>Coraciiformes,<br>Strigiformes,<br>Caprimulgiformes,<br>Accipitriformes,<br>Galliformes, NR |
| APQA 2018 | Non-published | NR | 92587 | 736 | Feces,<br>carcass | HA-test | NR                                                                                                                                                                                                                    |

**Abbreviations:** NIER: National Institute of Environmental Research; EWU: Ehwa womans university; APQA: Animal and Plant Quarantine Agency; NR: Not reported; RT-PCR: reverse transcription polymerase chain reaction; HA-test: Hemagglutination test.
